# Supplementary material
Source: PubMed Central journal article supplement (PMC5984136)
Supplement: NIHMS946316-supplement-supplement_1.pdf [file NIHMS946316-supplement-supplement_1.pdf]

**Supplementary Table 1.** Country-specific estimated expected and prevented numbers of rotavirus hospitalizations and deaths among children <5 years of age with hypothetical introduction of rotavirus vaccine into national immunization programs.

| Country                 | Mortality strata | Rotavirus hospitalizations |                |           |                |             |        | Rotavirus deaths |              |           |              |             |        |
|-------------------------|------------------|----------------------------|----------------|-----------|----------------|-------------|--------|------------------|--------------|-----------|--------------|-------------|--------|
|                         |                  | Expected                   |                | Prevented |                | % Prevented |        | Expected         |              | Prevented |              | % Prevented |        |
|                         |                  | n                          | 95%CI          | n         | 95%CI          | %           | 95%CI  | n                | 95%CI        | n         | 95%CI        | %           | 95%CI  |
| Afghanistan             | High             | 22607                      | 13169, 32702   | 7806      | 4177, 13041    | 35          | 27, 44 | 4802             | 4342, 5285   | 1700      | 1258, 2178   | 35          | 27, 44 |
| Bahrain                 | Low              | 389                        | 222, 567       | 364       | 208, 526       | 93          | 91, 95 | 0                | 0, 0         | 0         | 0, 0         | -           | -      |
| Bangladesh              | High             | 65418                      | 37735, 95310   | 26685     | 13809, 44575   | 41          | 51, 51 | 2721             | 2436, 3001   | 1115      | 826, 1447    | 41          | 51, 51 |
| Bhutan                  | High             | 307                        | 177, 439       | 130       | 66, 216        | 43          | 33, 53 | 13               | 12, 15       | 6         | 4, 7         | 43          | 33, 53 |
| Brunei Darussalam       | Medium           | 118                        | 64, 172        | 85        | 44, 128        | 72          | 63, 80 | 0                | 0, 0         | 0         | 0, 0         | -           | -      |
| Cambodia                | High             | 7714                       | 4402, 11011    | 3293      | 1765, 5499     | 44          | 33, 54 | 542              | 502, 578     | 235       | 177, 296     | 44          | 33, 54 |
| China                   | Medium           | 300570                     | 161868, 438140 | 211742    | 114174, 323848 | 72          | 63, 80 | 3191             | 2892, 3510   | 2278      | 1921, 2690   | 72          | 63, 80 |
| Hong Kong SAR of China  | Low              | 1017                       | 579, 1465      | 914       | 517, 1308      | 89          | 88, 91 | -                | -            | -         | -            | -           | -      |
| India                   | High             | 525203                     | 306030, 756658 | 199350    | 102114, 335485 | 39          | 29, 48 | 47145            | 42560, 51676 | 18185     | 13438, 23300 | 39          | 29, 48 |
| Indonesia               | High             | 108930                     | 62198, 153101  | 39073     | 20321, 65606   | 37          | 28, 48 | 3771             | 3493, 4039   | 1400      | 1053, 1757   | 37          | 28, 48 |
| Iran                    | Medium           | 24345                      | 12941, 35443   | 16990     | 9041, 26678    | 71          | 63, 80 | 269              | 234, 303     | 190       | 158, 228     | 71          | 63, 80 |
| Iraq                    | High             | 24393                      | 14078, 34904   | 7747      | 4150, 12826    | 32          | 24, 40 | 989              | 898, 1084    | 316       | 239, 407     | 32          | 24, 40 |
| Jordan                  | Medium           | 4260                       | 2284, 6149     | 2956      | 1565, 4586     | 70          | 62, 79 | 57               | 52, 62       | 40        | 34, 47       | 70          | 62, 79 |
| Kazakhstan              | Medium           | 6993                       | 3768, 10173    | 4176      | 2172, 6351     | 60          | 53, 67 | 65               | 55, 75       | 38        | 31, 47       | 60          | 53, 67 |
| DPR Korea               | High             | 7563                       | 4264, 10710    | 3180      | 1667, 5150     | 43          | 32, 52 | 192              | 171, 211     | 82        | 60, 104      | 43          | 32, 52 |
| Republic of Korea       | Low              | 8292                       | 4621, 11854    | 7607      | 4270, 10934    | 92          | 90, 94 | 5                | 4, 6         | 5         | 4, 5         | 92          | 90, 94 |
| Kuwait                  | Medium           | 1076                       | 583, 1588      | 768       | 400, 1185      | 71          | 63, 80 | 1                | 1, 1         | 1         | 1, 1         | 71          | 63, 80 |
| Kyrgyzstan              | Medium           | 2606                       | 1400, 3849     | 1812      | 962, 2781      | 69          | 61, 77 | 54               | 46, 62       | 37        | 30, 45       | 69          | 61, 77 |
| Lao PDR                 | High             | 3308                       | 1924, 4817     | 1181      | 596, 1992      | 37          | 28, 45 | 797              | 736, 859     | 292       | 216, 366     | 37          | 28, 45 |
| Lebanon                 | Medium           | 1649                       | 876, 2362      | 1059      | 563, 1600      | 65          | 57, 72 | 5                | 4, 6         | 3         | 3, 4         | 65          | 57, 72 |
| Malaysia                | Low              | 9568                       | 5446, 13700    | 8491      | 4852, 12269    | 89          | 88, 91 | 40               | 37, 43       | 36        | 33, 39       | 89          | 88, 91 |
| Maldives                | Medium           | 132                        | 73, 197        | 94        | 52, 149        | 72          | 63, 80 | 0                | 0, 0         | 0         | 0, 0         | -           | -      |
| Mongolia                | High             | 1542                       | 896, 2236      | 664       | 344, 1104      | 43          | 33, 54 | 57               | 52, 63       | 25        | 19, 32       | 43          | 33, 54 |
| Myanmar                 | High             | 20170                      | 11305, 28489   | 7810      | 4134, 12971    | 40          | 30, 49 | 1739             | 1617, 1865   | 694       | 520, 867     | 40          | 30, 49 |
| Nepal                   | High             | 11974                      | 6953, 17444    | 4475      | 2372, 7524     | 38          | 29, 47 | 509              | 458, 562     | 194       | 144, 249     | 38          | 29, 47 |
| Palestinian Territories | High             | 3088                       | 1750, 4361     | 1279      | 686, 2094      | 43          | 33, 53 | -                | -            | -         | -            | -           | -      |
| Oman                    | Medium           | 1370                       | 740, 1972      | 969       | 527, 1469      | 72          | 63, 80 | 5                | 4, 6         | 4         | 3, 4         | 72          | 63, 80 |
| Pakistan                | High             | 105903                     | 61398, 153383  | 39108     | 21146, 64401   | 38          | 29, 47 | 14704            | 13394, 15897 | 5560      | 4130, 7044   | 38          | 29, 47 |
| Philippines             | High             | 49767                      | 28457, 71484   | 19704     | 10361, 31764   | 41          | 31, 49 | 2601             | 2424, 2792   | 1058      | 787, 1309    | 41          | 31, 49 |
| Qatar                   | Low              | 477                        | 269, 683       | 442       | 247, 631       | 92          | 90, 94 | 0                | 0            | 0         | 0            | -           | -      |
| Saudi Arabia            | Medium           | 10486                      | 5476, 15269    | 7385      | 3805, 11357    | 71          | 62, 79 | 64               | 58, 71       | 45        | 38, 53       | 71          | 62, 79 |
| Singapore               | Low              | 966                        | 559, 1402      | 879       | 514, 1282      | 91          | 89, 93 | 1                | 1, 1         | 1         | 1, 1         | 91          | 89, 93 |
| Sri Lanka               | Medium           | 5748                       | 3097, 8455     | 4110      | 2189, 6240     | 71          | 63, 80 | 22               | 19, 25       | 16        | 13, 19       | 71          | 63, 80 |
| Syria                   | Medium           | 7738                       | 4261, 11438    | 3381      | 1832, 5246     | 44          | 39, 49 | 336              | 303, 369     | 148       | 124, 172     | 44          | 39, 49 |
| Tajikistan              | High             | 5103                       | 2920, 7216     | 2106      | 1090, 3439     | 42          | 33, 52 | 337              | 293, 387     | 141       | 106, 186     | 42          | 33, 52 |
| Thailand                | Medium           | 13522                      | 7329, 19642    | 9583      | 5114, 14980    | 71          | 63, 80 | 124              | 115, 133     | 89        | 76, 102      | 71          | 63, 80 |
| Timor-Leste             | High             | 899                        | 508, 1271      | 373       | 189, 596       | 41          | 32, 52 | 111              | 104, 119     | 46        | 35, 58       | 41          | 32, 52 |

|                      |        |       |              |       |              |    |        |      |            |     |          |    |        |
|----------------------|--------|-------|--------------|-------|--------------|----|--------|------|------------|-----|----------|----|--------|
| Turkey               | Medium | 23275 | 12840, 34716 | 16402 | 8890, 25194  | 71 | 62, 79 | 106  | 96, 166    | 75  | 63, 88   | 71 | 62, 79 |
| Turkmenistan         | High   | 2944  | 1727, 4233   | 1273  | 656, 2043    | 43 | 33, 53 | 169  | 146, 192   | 73  | 53, 96   | 43 | 33, 53 |
| United Arab Emirates | Low    | 1719  | 973, 2492    | 1598  | 905, 2323    | 93 | 91, 94 | 3    | 2, 4       | 3   | 2, 3     | 93 | 91, 94 |
| Uzbekistan           | High   | 13873 | 7946, 19903  | 6015  | 3133, 9900   | 44 | 33, 54 | 755  | 661, 850   | 329 | 240, 423 | 44 | 33, 54 |
| Vietnam              | Medium | 27774 | 14597, 39705 | 19026 | 9790, 288471 | 69 | 61, 77 | 1041 | 963, 1110  | 718 | 616, 819 | 69 | 61, 77 |
| Yemen                | High   | 17538 | 10048, 25073 | 6506  | 3455, 10810  | 38 | 29, 47 | 1570 | 1430, 1715 | 594 | 444, 754 | 38 | 29, 47 |
